# Supplementary material for: Dual film-like organelles enable spatial separation of orthogonal eukaryotic translation
Source: PubMed Central journal article supplement — Cell. 2021 Sep 16;184(19):4886–4903.e21. doi: 10.1016/j.cell.2021.08.001 (PMC8480389; doi:10.1016/j.cell.2021.08.001), 2021-09-16

**Cell, Volume 184**

**Supplemental information**

**Dual film-like organelles enable spatial  
separation of orthogonal eukaryotic translation**

**Christopher D. Reinkemeier and Edward A. Lemke**

# Dual film-like organelles enable spatial separation of orthogonal eukaryotic translation

**Authors:** Christopher D. Reinkemeier<sup>1,2,3</sup>, Edward A. Lemke<sup>1,2,4\*</sup>

**Affiliations:**

1) Biocentre, Departments of Biology and Chemistry, Johannes Gutenberg University Mainz, Hanns-Dieter-Hüscher-Weg 17, 55128 Mainz, Germany.

2) Institute of Molecular Biology gGmbH, Ackermannweg 4, 55128 Mainz, Germany.

3) Structural and Computational Biology Unit and Cell Biology and Biophysics Unit, European Molecular Biology Laboratory, Meyerhofstrasse 1, 69117 Heidelberg, Germany.

4) Lead Contact

\*Correspondence to: [edlemke@uni-mainz.de](mailto:edlemke@uni-mainz.de)

**Data S1: Related to Results and STAR METHODS. MS/MS Spectra of mCherry and EGFP purified from Mammalian Cells with Cbz-K and 3-IF.**

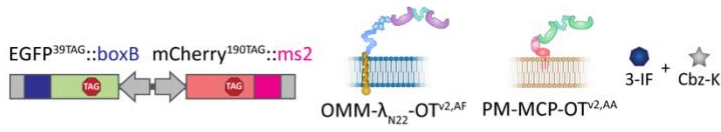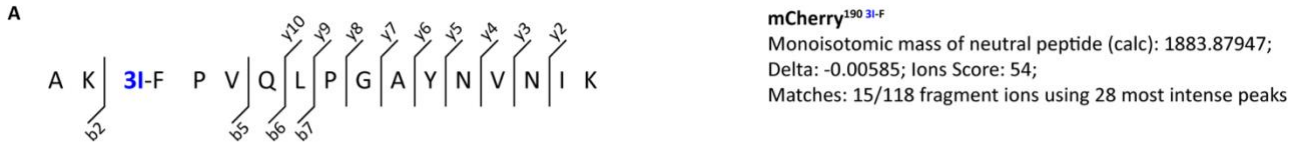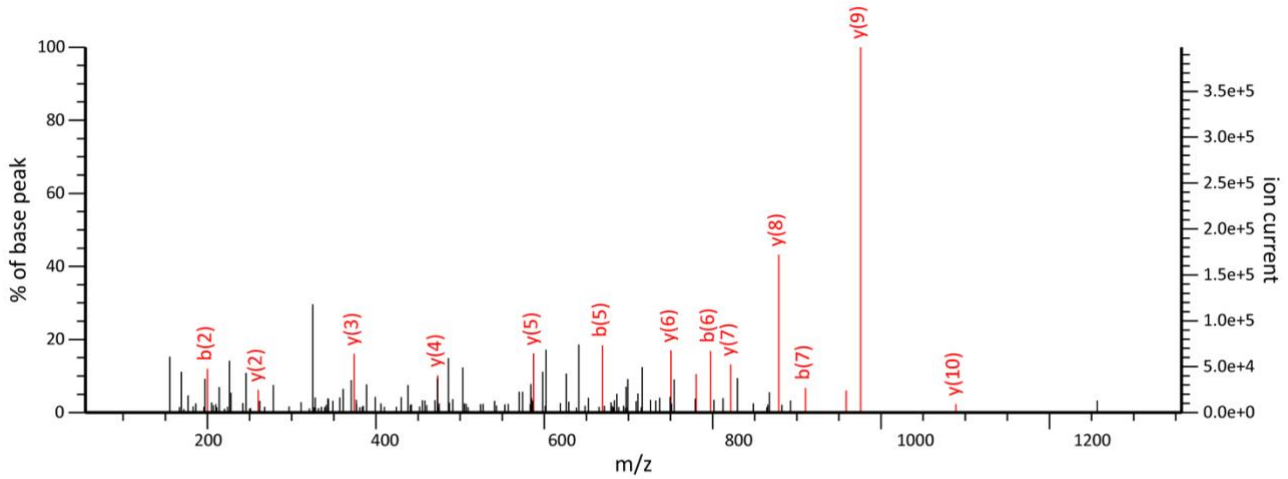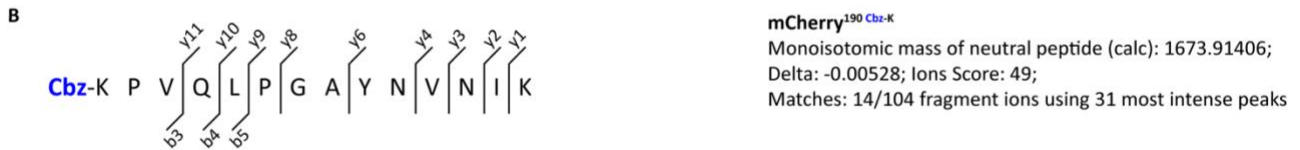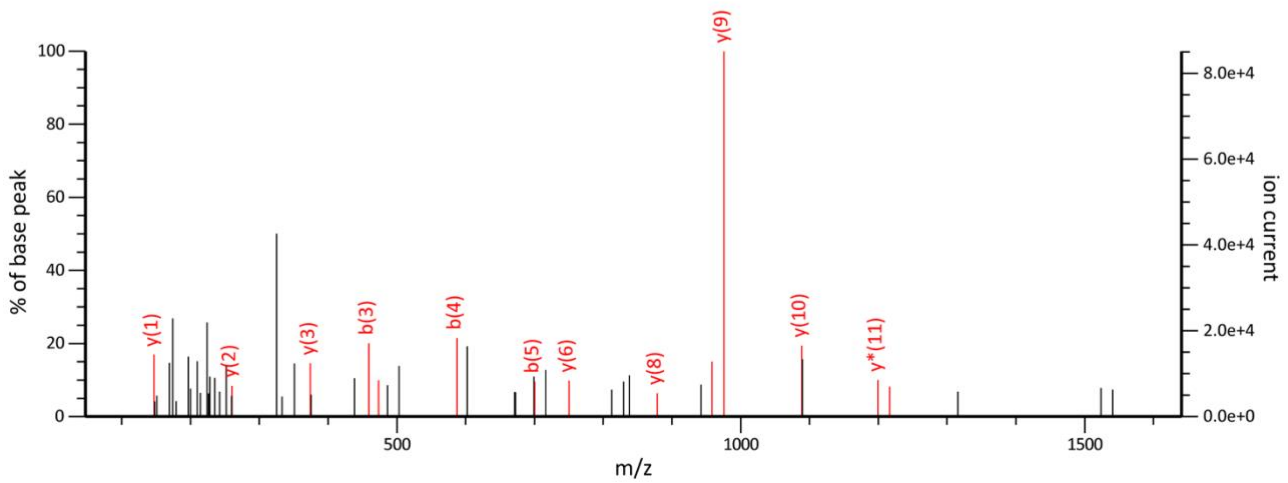

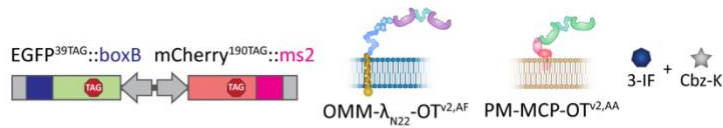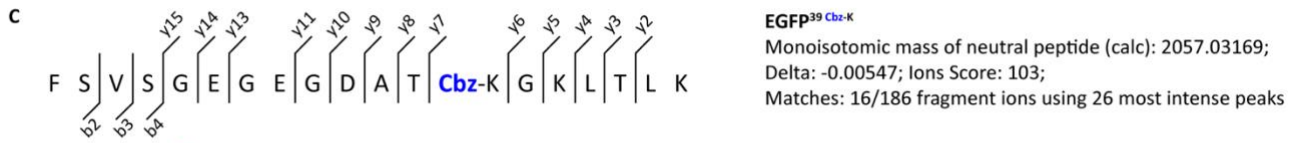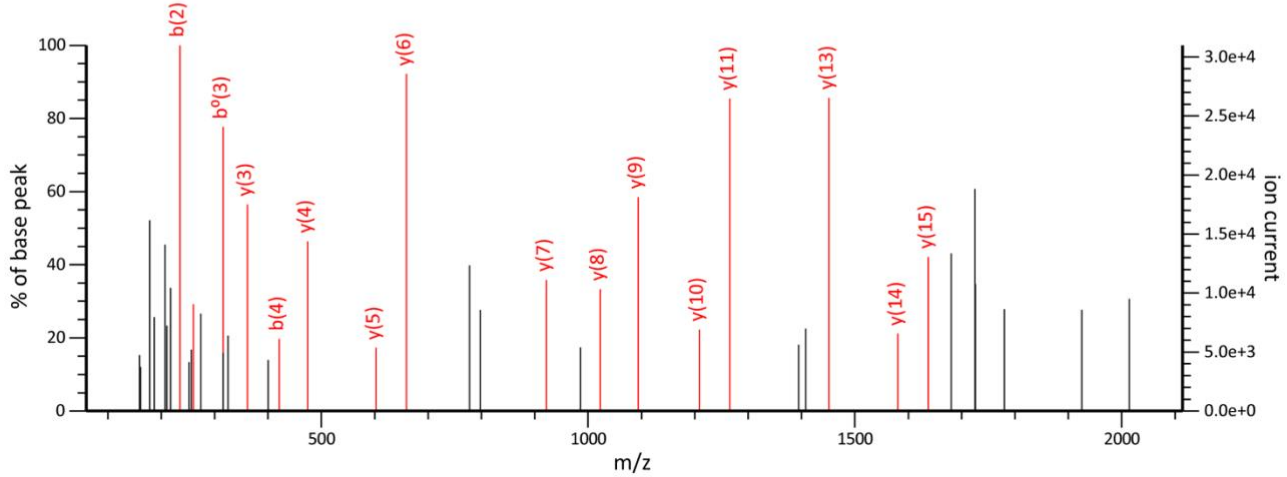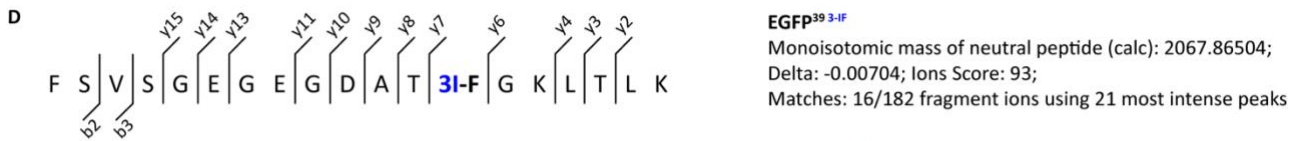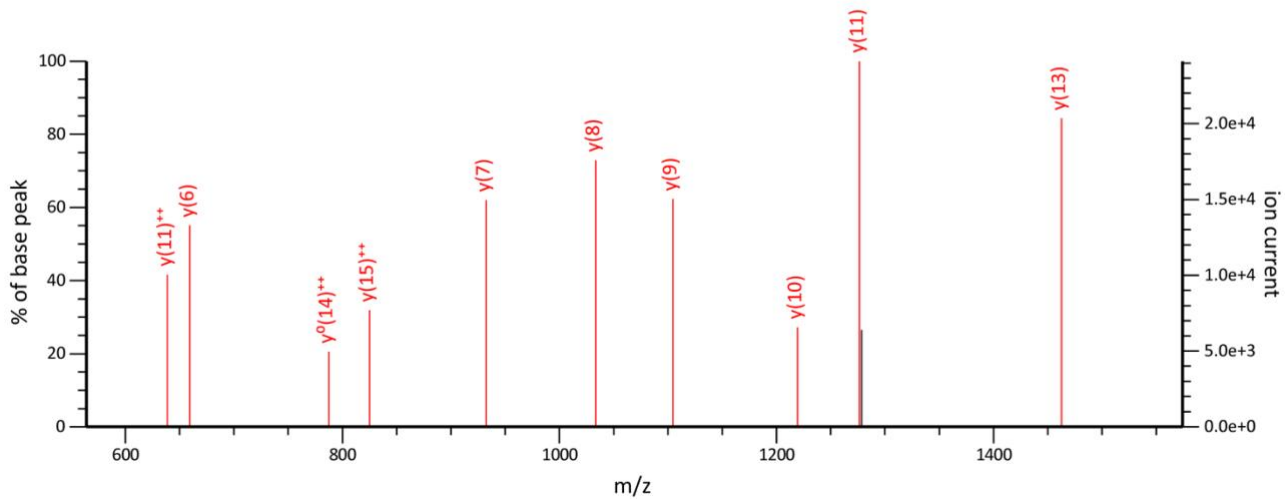

MS/MS spectra of mCherry and EGFP purified from HEK293T cells expressing OMM-λ<sub>N22</sub>-OT<sup>V2,AF</sup> system together with PM-MCP-OT<sup>V2,AA</sup>, the double-recruitment reporter (EGFP<sup>39TAG</sup>::boxB, mCherry<sup>190TAG</sup>::ms2) and tRNA<sup>Pyl</sup> in presence of the ncAAs Cbz-K and 3-IF. EGFP and mCherry were co-purified using a mix of equal amounts of GFP- and RFP-Trap beads and subsequently analyzed via SDS-PAGE, followed by tryptic digest in the gel and LC-MS/MS analysis.

(A,B) By design mCherry should be modified at position 190 (see Table S4 for sequence details) and it should be predominantly modified with 3-IF, thus we can identify peptides corresponding to mCherry<sup>190</sup> 3-IF (A). However, from FFC analysis we know that for this system we expect a 6-fold selectivity for incorporating a phenylalanine derivative into mCherry over EGFP and a 7-fold ratio for incorporating a lysine derivative into EGFP over mCherry (see Figure 5). Thus, also while most mCherry molecules should contain 3-IF some can also contain Cbz-K. As LC-MS/MS is highly sensitive, we can thus also identify peptides corresponding to mCherry<sup>190</sup> Cbz-K (B).

(C,D) Analogously, EGFP should be modified at position 39 (see Table S4 for sequence details) and it should be predominantly modified with Cbz-K and we can identify peptides corresponding to EGFP<sup>39</sup> Cbz-K (C). However, also here we expect the effect of finite selectivity (as described above) and thus we can also detect EGFP<sup>39</sup> 3-IF (D), which is in line with our expectation that while most EGFP molecules should contain Cbz-K some can also contain 3-IF, which can be detected by a LC-MS/MS due to the very high sensitivity.

It is however important to note that from these non-quantitative MS/MS experiments we cannot deduce a ratio of how much 3-IF or Cbz-K is incorporated in each respective protein and thus we performed bioorthogonal labeling experiments to get a more quantitative estimate as shown in Figure 6. Here, we show spectra for peptides with the highest detected “Ions Score”.

**Data S2: Related to STAR METHODS. Synthesis Scheme for SCO-Y and corresponding NMR spectra.**

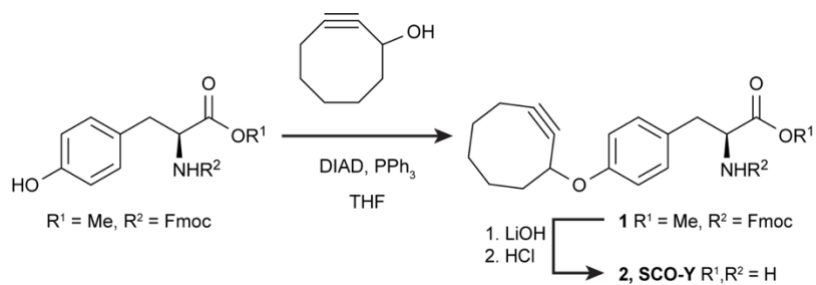

Synthesis scheme SCO-Y as described in the STAR METHODS section.

# $^1\text{H}$ NMR of Fmoc-SCO-Y-OMe (1)

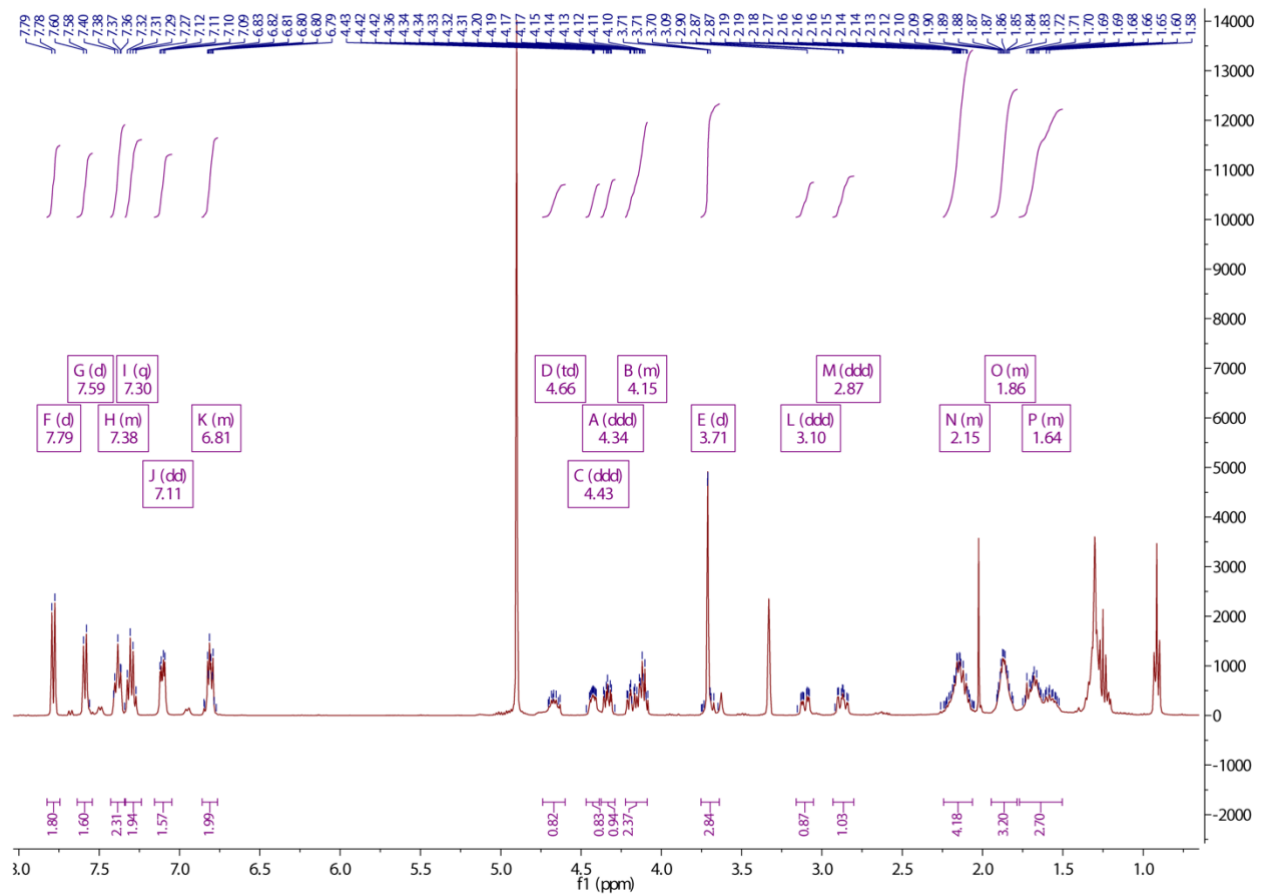

# <sup>1</sup>H NMR of SCO-Y (2)

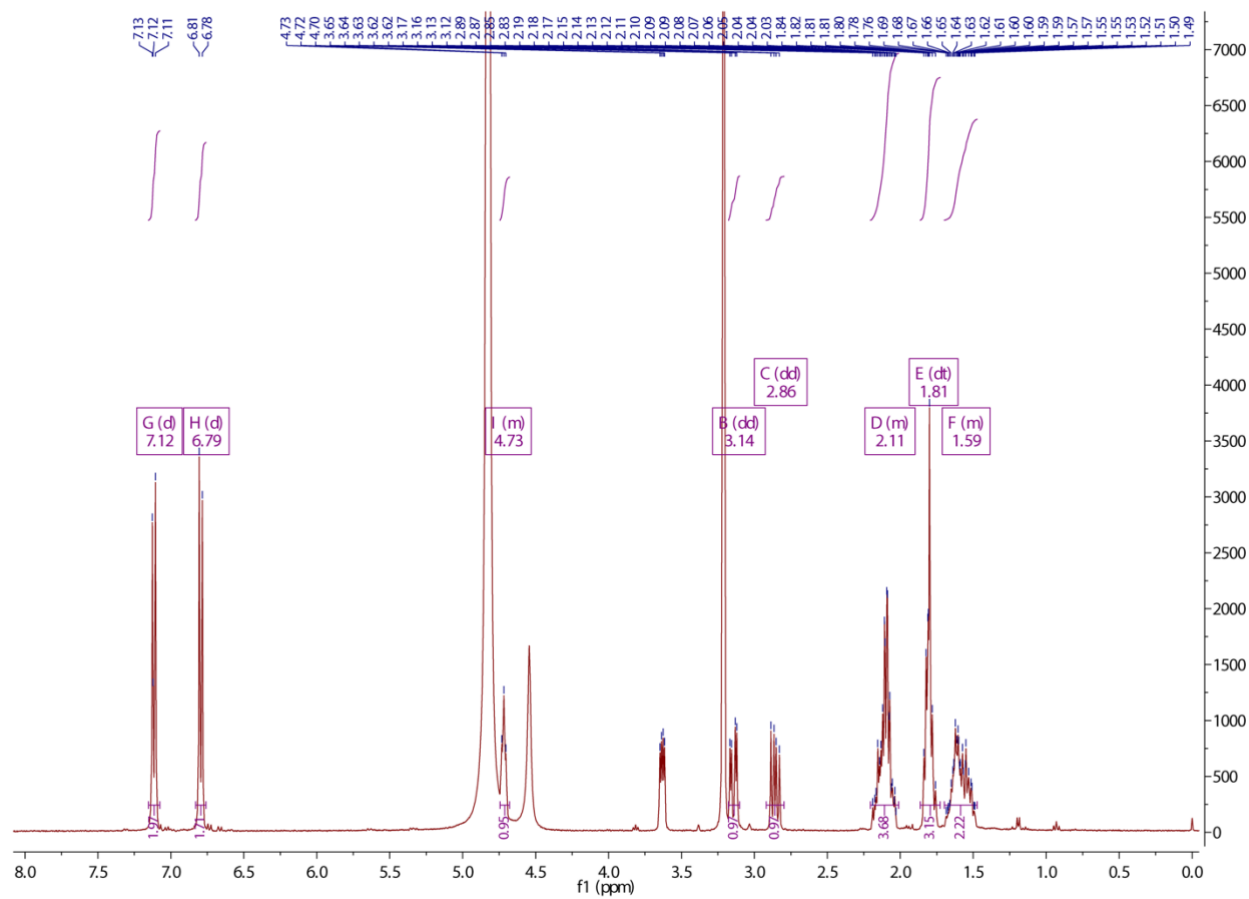



# $^{13}\text{C}$ NMR of SCO-Y (2)

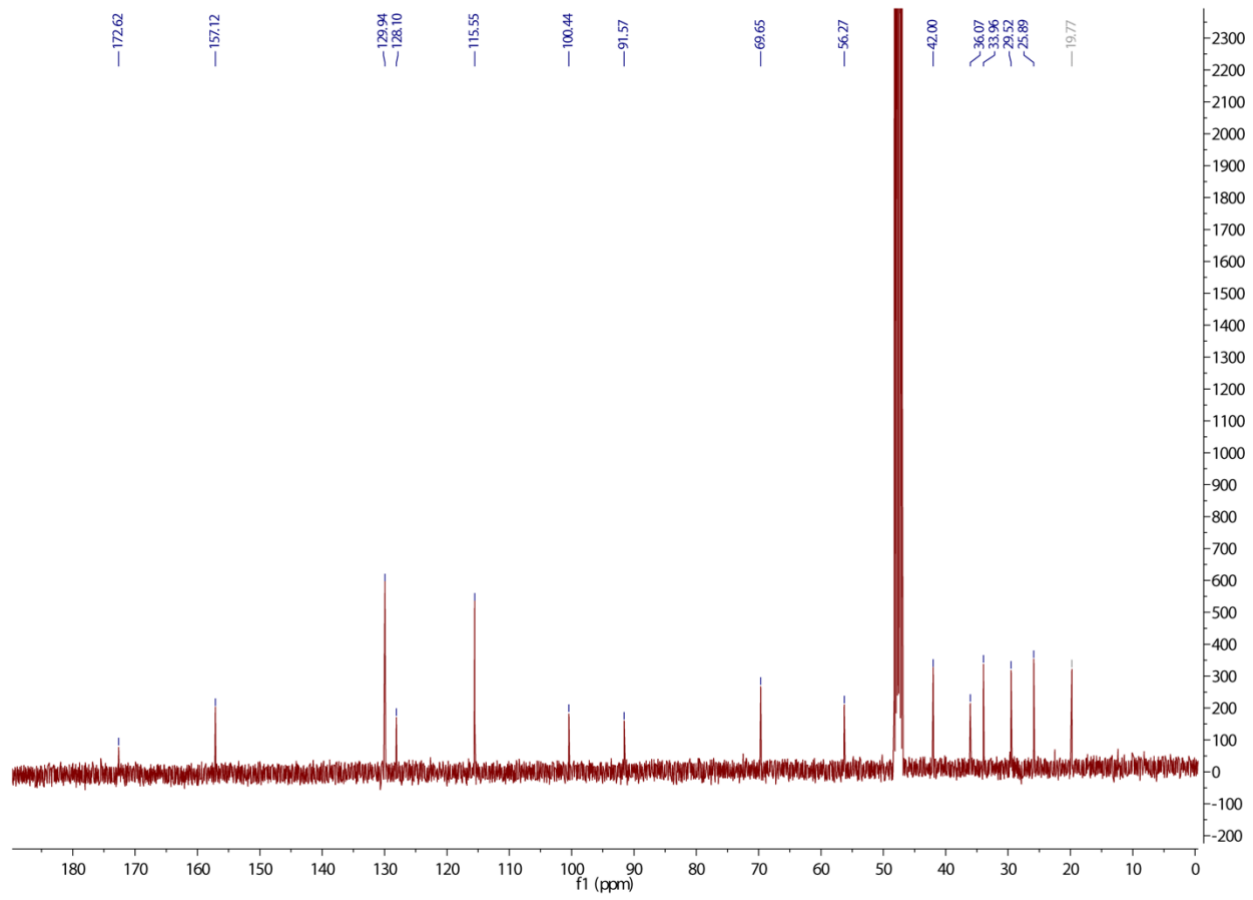

Supplement: mmc1.pdf [file mmc1.pdf]
