# Supplementary material for: Dual film-like organelles enable spatial separation of orthogonal eukaryotic translation
Source: PubMed Central journal article supplement — Cell. 2021 Sep 16;184(19):4886–4903.e21. doi: 10.1016/j.cell.2021.08.001 (PMC8480389; doi:10.1016/j.cell.2021.08.001), 2021-09-16
Supplement: mmc2.pdf [file mmc2.pdf]

**Table S1. Related to STAR METHODS. List of plasmids generated or used in this study.**

| <b>Name [vector_gene(s)]</b>                                                                                             | <b>Promoters</b> | <b>Availability</b>    |
|--------------------------------------------------------------------------------------------------------------------------|------------------|------------------------|
| pcDNA3.1_LCK <sub>1-10</sub> ::HA::MCP                                                                                   | CMV              | Available upon request |
| pcDNA3.1_LCK <sub>1-10</sub> ::Myc::EWSR1 <sub>1-628</sub> ::4xλ <sub>N22</sub>                                          | CMV              | Available upon request |
| pcDNA3.1_LCK <sub>1-10</sub> ::EWSR1 <sub>1-628</sub> ::HA::MCP                                                          | CMV              | Available upon request |
| pcDNA3.1_LCK <sub>1-10</sub> ::FLAG::NES::PyIRS <sup>Y306A, Y384F</sup>                                                  | CMV              | Available upon request |
| pcDNA3.1_LCK <sub>1-10</sub> ::FUS <sub>1-478</sub> ::NES::PyIRS <sup>Y306A, Y384F</sup>                                 | CMV              | Available upon request |
| pcDNA3.1_LCK <sub>1-10</sub> ::FUS <sub>1-478</sub> ::HA::MCP::FLAG::NES::PyIRS <sup>Y306A, Y384F</sup>                  | CMV              | Available upon request |
| pcDNA3.1_LCK <sub>1-10</sub> ::FUS <sub>1-478</sub> ::HA::MCP::FLAG::NES::PyIRS <sup>N346A, C348A</sup>                  | CMV              | Available upon request |
| pcDNA3.1_LCK <sub>1-10</sub> ::FUS <sub>1-478</sub> ::V5::Myc::4xλ <sub>N22</sub> ::NES::PyIRS <sup>Y306A, Y384F</sup>   | CMV              | Available upon request |
| pcDNA3.1_EBAG9 <sub>1-29</sub> ::HA::MCP                                                                                 | CMV              | Available upon request |
| pcDNA3.1_EBAG9 <sub>1-29</sub> ::EWSR1 <sub>1-628</sub> ::Myc::4xλ <sub>N22</sub>                                        | CMV              | Available upon request |
| pcDNA3.1_EBAG9 <sub>1-29</sub> ::EWSR1 <sub>1-628</sub> ::HA::MCP                                                        | CMV              | Available upon request |
| pcDNA3.1_EBAG9 <sub>1-29</sub> ::FLAG::NES::PyIRS <sup>Y306A, Y384F</sup>                                                | CMV              | Available upon request |
| pcDNA3.1_EBAG9 <sub>1-29</sub> ::FUS <sub>1-478</sub> ::FLAG::NES::PyIRS <sup>Y306A, Y384F</sup>                         | CMV              | Available upon request |
| pcDNA3.1_EBAG9 <sub>1-29</sub> ::FUS <sub>1-478</sub> ::HA::MCP::FLAG::NES::PyIRS <sup>Y306A, Y384F</sup>                | CMV              | Available upon request |
| pcDNA3.1_EBAG9 <sub>1-29</sub> ::FUS <sub>1-478</sub> ::V5::Myc::4xλ <sub>N22</sub> ::NES::PyIRS <sup>Y306A, Y384F</sup> | CMV              | Available upon request |
| pcDNA3.1_CYPIC1 <sub>1-27</sub> ::HA::MCP                                                                                | CMV              | Available upon request |
| pcDNA3.1_CYPIC1 <sub>1-27</sub> ::EWSR1 <sub>1-628</sub> ::Myc::4xλ <sub>N22</sub>                                       | CMV              | Available upon request |

|                                                                                                                                                                                                                                                                                                                                                                                                             |             |                        |
|-------------------------------------------------------------------------------------------------------------------------------------------------------------------------------------------------------------------------------------------------------------------------------------------------------------------------------------------------------------------------------------------------------------|-------------|------------------------|
| pcDNA3.1_CYPIC1 <sub>1-27</sub> ::EWSR1 <sub>1-628</sub> ::HA::MCP                                                                                                                                                                                                                                                                                                                                          | CMV         | Available upon request |
| pcDNA3.1_CYPIC1 <sub>1-27</sub> ::V5::NES::PyIRS <sup>Y306A, Y384F</sup>                                                                                                                                                                                                                                                                                                                                    | CMV         | Available upon request |
| pcDNA3.1_CYPIC1 <sub>1-27</sub> ::FUS <sub>1-478</sub> ::V5::NES::PyIRS <sup>Y306A, Y384F</sup>                                                                                                                                                                                                                                                                                                             | CMV         | Available upon request |
| pcDNA3.1_CYPIC1 <sub>1-27</sub> ::FUS <sub>1-478</sub> ::HA::MCP::FLAG::NES::PyIRS <sup>Y306A, Y384F</sup>                                                                                                                                                                                                                                                                                                  | CMV         | Available upon request |
| pcDNA3.1_CYPIC1 <sub>1-27</sub> ::FUS <sub>1-478</sub> ::V5::Myc::4xλ <sub>N22</sub> ::NES::PyIRS <sup>Y306A, Y384F</sup>                                                                                                                                                                                                                                                                                   | CMV         | Available upon request |
| pcDNA3.1_TOM20 <sub>1-70</sub> ::MCP                                                                                                                                                                                                                                                                                                                                                                        | CMV         | Available upon request |
| pcDNA3.1_TOM20 <sub>1-70</sub> ::EWSR1 <sub>1-628</sub> ::Myc::4xλ <sub>N22</sub>                                                                                                                                                                                                                                                                                                                           | CMV         | Available upon request |
| pcDNA3.1_TOM20 <sub>1-70</sub> ::EWSR1 <sub>1-628</sub> ::HA::MCP                                                                                                                                                                                                                                                                                                                                           | CMV         | Available upon request |
| pcDNA3.1_TOM20 <sub>1-70</sub> ::NES::PyIRS <sup>Y306A, Y384F</sup>                                                                                                                                                                                                                                                                                                                                         | CMV         | Available upon request |
| pcDNA3.1_TOM20 <sub>1-70</sub> ::FUS <sub>1-478</sub> ::V5::NES::PyIRS <sup>Y306A, Y384F</sup>                                                                                                                                                                                                                                                                                                              | CMV         | Available upon request |
| pcDNA3.1_TOM20 <sub>1-70</sub> ::FUS <sub>1-478</sub> ::HA::MCP::FLAG::NES::PyIRS <sup>Y306A, Y384F</sup>                                                                                                                                                                                                                                                                                                   | CMV         | Available upon request |
| pcDNA3.1_TOM20 <sub>1-70</sub> ::FUS <sub>1-478</sub> ::V5::Myc::4xλ <sub>N22</sub> ::NES::PyIRS <sup>Y306A, Y384F</sup>                                                                                                                                                                                                                                                                                    | CMV         | Available upon request |
| pcDNA3.1_TOM20 <sub>1-70</sub> ::FUS <sub>1-478</sub> ::V5::Myc::4xλ <sub>N22</sub> ::NES::PyIRS <sup>N346A, C348A</sup>                                                                                                                                                                                                                                                                                    | CMV         | Available upon request |
| pBI_CYPIC1 <sub>1-27</sub> ::EWSR1 <sub>1-628</sub> ::HA::MCP::VSV-G::NES::PyIRS <sup>Y306A, Y384F</sup> ::FUS <sub>1-478</sub> ::PyIRS <sup>Y306A, Y384F</sup> _U6-tRNA <sup>Pyl, CUA</sup> (see Table S2 for further details)                                                                                                                                                                             | pBI-CMV, U6 | Available upon request |
| pBI_LCK <sub>1-10</sub> ::HA::MCP::SPOT::NES::PyIRS <sup>N346A, C348A</sup> ::FUS <sub>1-478</sub> ::PyIRS <sup>N346A, C348A</sup> _U6-tRNA <sup>Pyl, CUA</sup> (see Table S2 for further details)                                                                                                                                                                                                          | pBI-CMV, U6 | Available upon request |
| pBI_TOM20 <sub>1-70</sub> ::EWSR1 <sub>1-628</sub> ::Myc::4xλ <sub>N22</sub> ::VSV-G::NES::PyIRS <sup>Y306A, Y384F</sup> ::FUS <sub>1-478</sub> ::PyIRS <sup>Y306A, Y384F</sup> _U6-tRNA <sup>Pyl, CUA</sup> (see Table S2 for further details)                                                                                                                                                             | pBI-CMV, U6 | Available upon request |
| pBI_TOM20 <sub>1-70</sub> ::EWSR1 <sub>1-628</sub> ::Myc::4xλ <sub>N22</sub> ::SPOT::NES::PyIRS <sup>N346A, C348A</sup> ::FUS <sub>1-478</sub> ::PyIRS <sup>N346A, C348A</sup> _U6-tRNA <sup>Pyl, CUA</sup> (see Table S2 for further details)                                                                                                                                                              | pBI-CMV, U6 | Available upon request |
| pBI_CYPIC1 <sub>1-27</sub> ::EWSR1 <sub>1-628</sub> ::HA::MCP::VSV-G::NES::PyIRS <sup>Y306A, Y384F</sup> ::FUS <sub>1-478</sub> ::PyIRS <sup>Y306A, Y384F</sup> _TOM20 <sub>1-70</sub> ::EWSR1 <sub>1-628</sub> ::Myc::4xλ <sub>N22</sub> ::SPOT::NES::PyIRS <sup>N346A, C348A</sup> ::FUS <sub>1-478</sub> ::PyIRS <sup>N346A, C348A</sup> _U6-tRNA <sup>Pyl, CUA</sup> (see Table S2 for further details) | pBI-CMV, U6 | Available upon request |

|                                                                                                                                                                                                                                                                                                                                                                                              |                |                           |
|----------------------------------------------------------------------------------------------------------------------------------------------------------------------------------------------------------------------------------------------------------------------------------------------------------------------------------------------------------------------------------------------|----------------|---------------------------|
| pBI_LCK <sub>1-10</sub> ::HA::MCP::SPOT::NES::PyIRS <sup>N346A,C348A</sup> ::FUS <sub>1-478</sub> ::<br>PyIRS <sup>N346A,C348A</sup> _TOM20 <sub>1-70</sub> ::EWSR1 <sub>1-628</sub> ::Myc::4xλ <sub>N22</sub> ::VSV-G::<br>NES::PyIRS <sup>Y306A,Y384F</sup> ::FUS <sub>1-478</sub> ::PyIRS <sup>Y306A,Y384F</sup> _tRNA <sup>PyI,CUA</sup> ( <i>see Table S2<br/>for further details</i> ) | pBI-CMV,<br>U6 | Available upon<br>request |
| pBI_NLS::mCherry <sup>190TAG</sup> ::6xHis::2xms2_NLS::FLAG::EGFP <sup>39TAG</sup> ::6xHis<br>see also (Reinkemeier et al., 2019)                                                                                                                                                                                                                                                            | pBI-CMV        | Available upon<br>request |
| pBI_NLS::mCherry <sup>190TAG</sup> ::6xHis::4xboxB_NLS::FLAG::EGFP <sup>39TAG</sup> ::6xHis                                                                                                                                                                                                                                                                                                  | pBI-CMV        | Available upon<br>request |
| pBI_NLS::mCherry <sup>190TAG</sup> ::6xHis::2xms2_<br>NLS::FLAG::EGFP <sup>39TAG</sup> ::6xHis::4xboxB                                                                                                                                                                                                                                                                                       | pBI-CMV        | Available upon<br>request |
| pBI_NLS::FLAG::EGFP <sup>39TAG</sup> ::6xHis::4xboxB_(empty MCS)::2xms2                                                                                                                                                                                                                                                                                                                      | pBI-CMV        | Available upon<br>request |
| pBI_NLS::FLAG::EGFP <sup>39TAG</sup> ::6xHis::2xms2_(empty MCS)::4xboxB                                                                                                                                                                                                                                                                                                                      | pBI-CMV        | Available upon<br>request |
| pBI_H2B::mCherry <sup>190TAG</sup> ::6xHis::2xms2_<br>Nup153::EGFP <sup>149TAG</sup> ::6xHis::4xboxB                                                                                                                                                                                                                                                                                         | pBI-CMV        | Available upon<br>request |
| pcDNA3.1_NES::PyIRS <sup>N346A,C348A</sup><br>see also (Reinkemeier et al., 2019)                                                                                                                                                                                                                                                                                                            | CMV            | Available upon<br>request |
| pcDNA3.1_NES::PyIRS <sup>Y306A,Y384F</sup><br>see also (Nikić et al., 2016)                                                                                                                                                                                                                                                                                                                  | CMV            | Available upon<br>request |
| pUC57_U6-tRNA <sup>PyI,CUA</sup>                                                                                                                                                                                                                                                                                                                                                             | U6             | Available upon<br>request |
| pCI_NLS::iRFP713::FLAG::EGFP <sup>39TAG</sup> ::6xHis<br>see also (Nikić et al., 2016)                                                                                                                                                                                                                                                                                                       | CMV            | Available upon<br>request |
