# Supplementary material for: Dual film-like organelles enable spatial separation of orthogonal eukaryotic translation
Source: PubMed Central journal article supplement — Cell. 2021 Sep 16;184(19):4886–4903.e21. doi: 10.1016/j.cell.2021.08.001 (PMC8480389; doi:10.1016/j.cell.2021.08.001), 2021-09-16
Supplement: mmc3.pdf [file mmc3.pdf]

**Table S2. Related to STAR METHODS. Amino acid sequence of internally linked PyIRS dimers.**

|                                                                                                                                                                                                                                              |                                                                                                                                                                                                                                                                                                                                                                                                                                                                                                                                                                                                                                                                                                                                                                                                                                                                                                                                                                                                                                                                                                                                                                                                                                                                                                                                                                                                                                                                                                                                                                                                                                |
|----------------------------------------------------------------------------------------------------------------------------------------------------------------------------------------------------------------------------------------------|--------------------------------------------------------------------------------------------------------------------------------------------------------------------------------------------------------------------------------------------------------------------------------------------------------------------------------------------------------------------------------------------------------------------------------------------------------------------------------------------------------------------------------------------------------------------------------------------------------------------------------------------------------------------------------------------------------------------------------------------------------------------------------------------------------------------------------------------------------------------------------------------------------------------------------------------------------------------------------------------------------------------------------------------------------------------------------------------------------------------------------------------------------------------------------------------------------------------------------------------------------------------------------------------------------------------------------------------------------------------------------------------------------------------------------------------------------------------------------------------------------------------------------------------------------------------------------------------------------------------------------|
| <p><b>PM-MCP-OT<sub>v2,AA</sub></b><br/> <i>LCK<sub>1-10</sub></i><br/> <i>HA</i><br/> <i>MCP</i><br/> <i>SPOT</i><br/> <i>NES</i><br/> <i>PyIRS<sup>AA</sup></i><br/> <i>FUS<sub>1-478</sub></i></p>                                        | <p>MGCVCSSNPEGTELAIAYPYDVPDYAGAPGSAGSAAGSGASNFTQFVLVDNNGTGDVTVAPSNFANGIAEWISSNSRSQAYKVTCSVRQSSAQNRKYTIKVEVPKGAWRSYLNMEITIPFATNSDCELVKAMQGLLKDGNPIPSAIAANSGLSGLSPDRVRAVSHWSSACPVPLQLPPLERLTLDDKKPLNTLISATGLWMSRTGTIHKIKHHEVSRSKIYIEMACGDHLVVNNSRSSRTARALRHHKYRKTCKRRCRVSDLEDLNKFLTKANEDQTSVKVKVVSAPTRTKKAMPKSVARAPKPLENTEAAQAQPSGSKFSPAIPVSTQESVSVPASVSTSISSISTGATASALVKGNTPITSMSAPVQASAPALTKSQTDRLEVLLNPKDEISLNSGKPFRELESELLSRRKKDLQIQIYAEERENYLGLKLEREITRFFVDRGFLEIKSPIPILEIYIERMGIDNDELTSKQIFRVDKNFCLRPMLAPNLNYLRLKLDRALPDPKIFEIGPCYRKESDGKEHLEEFMTLAFAMGSGCTRENLESIITDFLNHLGIDFKIVGDSCMVYGDTLDMHGDLELSSAVVGPIPLDREWIDKWPWAGAGFLERLLKVKHDFKNIKRAARSESYNGISTNLASNDYTQQATQSYGAYPTQPGQGYSSQSSQPYGQQSYSGYSQSTDTSGYGQSSYSSYGQSQNTGYGTQSTPQGYGSGTGGYGGSSQSSQSSYGGQSSYPGYGQQPAPSSTSGSYGSSSSQSSSYGQPQSGSYSQQPSYGGQQQSYGQQQSYNPPQGYGQQNQYNSSSGGGGGGGGGNYGQDQSSMSSGGSGGGYGNQDQSGGGGGGGYGGQDRGGRGRGGSGGGGGGGGGGNYRSSGGYEPGRGGGRGRGGMGGSDRGGFNKFGGPRDQGSRHDEQDSDNNTIFVQGLGENVTIESVADYFKQIGIIKTNKKTGQPMINLYTDRETGKLGKGEATVSFDDPPSAKAIDWFDGKEFSGNPIKVSFATRRADFNRGGNGRGGRGRGGPMGRGGYGGGGSGGGGRGGFPSSGGGGGGQQRAGDWKCPNPTCENMNFWRNECNQCKAPKPDGPGGGPGGSHMGGNYGDDRRGGRGGDKKPLNTLISATGLWMSRTGTIHKIKHHEVSRSKIYIEMACGDHLVVNNSRSSRTARALRHHKYRKTCKRRCRVSDLEDLNKFLTKANEDQTSVKVKVVSAPTRTKKAMPKSVARAPKPLENTEAAQAQPSGSKFSPAIPVSTQESVSVPASVSTSISSISTGATASALVKGNTPITSMSAPVQASAPALTKSQTDRLEVLLNPKDEISLNSGKPFRELESELLSRRKKDLQIQIYAEERENYLGLKLEREITRFFVDRGFLEIKSPIPILEIYIERMGIDNDELTSKQIFRVDKNFCLRPMLAPNLNYLRLKLDRALPDPKIFEIGPCYRKESDGKEHLEEFMTLAFAMGSGCTRENLESIITDFLNHLGIDFKIVGDSCMVYGDTLDMHGDLELSSAVVGPIPLDREWIDKWPWAGAGFLERLLKVKHDFKNIKRAARSESYNGISTNL</p> |
| <p><b>ERM-MCP-OT<sub>v2,AF</sub></b><br/> <i>CYPIIC<sub>1-27</sub></i><br/> <i>EWSR1<sub>1-628</sub></i><br/> <i>HA</i><br/> <i>MCP</i><br/> <i>VSV-G</i><br/> <i>NES</i><br/> <i>PyIRS<sup>AF</sup></i><br/> <i>FUS<sub>1-478</sub></i></p> | <p>MDPVVVLGLCLSCLLLLSLWKQSYGGMMASTDYSTYSQAAAQQGYSAYTAQPTQGYAQTQAYGQQSYGTYGQPTDVSYTQAQTTATYGTAYATSYGQPPTGYTTPTAPQAYSQPVQGYGTGAYDTTATVTTTQASYAAQSAQYGTQPAYPAYGQQPAATAPTRPQDGNKPTETSQPSQSSGGYNQPSLGYGQSNYSYPQVPGSYPMQPVTAAPPSPPTSYSSTQPTSQDSSYSQQNTYGGPSSYGGQSSYGGQSSYGGQPPTSYPPQTGSYSQAPSQSSYGGQSSFRQDHPSSMGVYQESGGFSGPGENRSMSPDNRRGRGGFDRGGMSRGGRRGGMGMSAGERGGFNKPGGPMDEGPDLDLGPVDPDEDSDNSAIYVQGLNDSVTLDDLADFFKQCGVVKMNKRTGQPMIHIYLDKETGKPKGDATVSYEDPPTAKAAVEWFDGKDFQGSKLKVSARKKPPMNSMRGGLPPREGRGMPPPLRGGPGGPGGPMGRMGRRGGDRGGFPPRGRPRGSRGNPSSGGNVQHRAGDWQCPNPGCGNQNAWRTECNQCKAPKPEGFLPPPFPFGGDRGRGGP GGMRGGRRGLMDRGGPGMFRGGRRGGDRGGFRGGRRGMDRGGFGGRRGGPGGPPGLMEQAIAYPYDVPDYAGAPGSAGSAAGSGASNFTQFVLVDNNGTGDVTVAPSNFANGIAEWISSNSRSQAYKVTCSVRQSSAQNRKYTIKVEVPKGAWRSYLNMEITIPFATNSDCELVKAMQGLLKDGNPIPSAIAANSGLSGLSYTDIEMNRLGKACPVPLQLPPLERLTLDDKKPLNTLISATGLWMSRTGTIHKIKHHEVSRSKIYIEMACGDHLVVNNSRSSRTARALRHHKYRKTCKRRCRVSDLEDLNKFLTKANEDQTSVKVKVVSAPTRTKKAMPKSVARAPKPLENTEAAQAQPSGSKFSPAIPVSTQESVSVPASVSTSISSISTGATASALVKGNTPITSMSAPVQASAPALTKSQTDRLEVLLNPKDEISLNSGKPFRELESELLSRRKKDLQIQIYAEERENYLGLKLEREITRFFVDRGFLEIKSPIPILEIYIERMGIDNDELTSKQIFRVDKNFCLRPMLAPNLANYLRLKLDRALPDPKIFEIGPCYRKESDGKEHLEEFMTLNFQMGSGCTRENLESIITDFLNHLGIDFKIVGDSCMVYGDTLDMHGDLELSAVVGPIPLDREWIDKWPWAGAGFLERLLKVKHDFKNIKRAARSESYNGISTNLASNDYTQQATQSYGAYPTQPGQGYSSQSSQPYGQQSYSGYSQSTDTSGYGQSSYSSYGQSQNTGYGTQSTPQGYGSGTYGSSQSSQSSYGGQSSYPGYGQQPAPSSTSGSYGSSSSQSSSYGQPQSGSYSQQPSYGGQQQSYGQQQSYNPPQGYGQQNQYNSSSGGGGGGGGGNYGQDQSSMSSGGGGGGYGNQDQSGGGGGGGYGGQDRGGRGRGGSGGGGGGGGGGNYRSSGGYEPGRGGGRGGMGGSDRGGFNKFGGPR</p>                                         |

|                                                                                                                                                                                                                                                                                                             |                                                                                                                                                                                                                                                                                                                                                                                                                                                                                                                                                                                                                                                                                                                                                                                                                                                                                                                                                                                                                                                                                                                                                                                                                                                                                                                                                                                                                                                                                                                                                                                                                                                                                                                                                                                                                                                                                                                                                                                                                                                                                                                                                                                                                                                                                                                                                                                                                                                                                                                                                                                                |
|-------------------------------------------------------------------------------------------------------------------------------------------------------------------------------------------------------------------------------------------------------------------------------------------------------------|------------------------------------------------------------------------------------------------------------------------------------------------------------------------------------------------------------------------------------------------------------------------------------------------------------------------------------------------------------------------------------------------------------------------------------------------------------------------------------------------------------------------------------------------------------------------------------------------------------------------------------------------------------------------------------------------------------------------------------------------------------------------------------------------------------------------------------------------------------------------------------------------------------------------------------------------------------------------------------------------------------------------------------------------------------------------------------------------------------------------------------------------------------------------------------------------------------------------------------------------------------------------------------------------------------------------------------------------------------------------------------------------------------------------------------------------------------------------------------------------------------------------------------------------------------------------------------------------------------------------------------------------------------------------------------------------------------------------------------------------------------------------------------------------------------------------------------------------------------------------------------------------------------------------------------------------------------------------------------------------------------------------------------------------------------------------------------------------------------------------------------------------------------------------------------------------------------------------------------------------------------------------------------------------------------------------------------------------------------------------------------------------------------------------------------------------------------------------------------------------------------------------------------------------------------------------------------------------|
|                                                                                                                                                                                                                                                                                                             | <p>DQGSRRHDSEQDNSDNNTIFVQGLGENVTIESVADYFKQIGIHKTNKKTGQPMINLYTDRETGKLGKGEATVS<br/> FDDPPSAKAAIDWFDGKEFSGNPIKVSFATRRADFNRGGGNGRGGRRGGPMGRGGYGGGGSSGGG<br/> GRGGFPPSGGGGGGGQQRAGDWKCPNPTCENMNFWRNECNQCKAPKPDGPGGGPGGSHMGGNY<br/> GDDRRGGRRGGDKKPLNLTISATGLWMSRTGTIHKIKHHEVSRSKIYIEMACGDHLVVNNSRSSRTARAL<br/> RHHKYRKTCKRRCRVSEDLNKFLTKANEDQTSVKVKVVSAPTRTKKAMPKSVARAPKLENTEAAQAQ<br/> PSGSKFSPAIPVSTQESVSPASVSTSISSISTGATASALVKGNTNPITSMSAPVQASAPALTKSQTDRLE<br/> VLLNPKDEISLNSGKPFRELESELLSRRKKDLQQIYAEERENYLGKLEREITRFFVDRGFLEIKSPILIPLEYI<br/> ERMGIDNDELTSKQIFRVDKNFCLRPMLAPNLANYLRKLDRALPDIKIFEIGPCYRKESDQKEHLEEFM<br/> LNFCQMGSCTRENLESIITDFLNHLGIDFKIVGDSCMVFGDTLDMVHGDLELSSAVVGPIPLDREWGIDK<br/> PWIGAGFGLERLLKVKHDFKNIKRAARSESYNGISTNL</p>                                                                                                                                                                                                                                                                                                                                                                                                                                                                                                                                                                                                                                                                                                                                                                                                                                                                                                                                                                                                                                                                                                                                                                                                                                                                                                                                                                                                                                                                                                                                                                                                                                                                                                                                                                                                                                               |
| <p><b>OMM-<math>\lambda_{N22}</math><sup>-</sup></b><br/> <b>OT<sub>v2,AF</sub></b><br/> <i>TOM20<sub>1-70</sub></i><br/> <i>EWSR1<sub>1-628</sub></i><br/> <i>Myc</i><br/> <math>\lambda_{N22}</math><br/> <i>VSV-G</i><br/> <i>NES</i><br/> <i>PyIRS<sup>AF</sup></i><br/> <i>FUS<sub>1-478</sub></i></p> | <p><b>MVGRNSAIAAGVCGALFIGYCIYFDRKRRSDPNFKNRLRERRKKQKLAKERAGLSKLPDLKDAEAVQKFF</b><br/> MASTDYSTYSQAAAQQGYSAYTAQPTQGYAQTQAYGQQSYGTYGQPTDVSYTQAQTTATYGGTAYA<br/> TSYGGPPTGYTTPTAPQAYSQPVQGYGTGAYDTTATVTTTQASYAAQSAYGTQPAYPAYGQQPAATA<br/> PTRPQDGNKPTETSQPQSSTGGYNQPSLGYGQSNYSYPQVPGSYPMQPVTAPPSYPTSYSSTQPTS<br/> YDQSSYSQQNTYQGPSSYGQSSYGQSSYGQQPPTSYPPTQGSYSQAPSQYSQQSSSYGQSSFR<br/> QDHPSSMGVYGQESGGFSGPGENRSMSPDNRGRGRGGFDRGGMSRGGRRGGGRRGGMGSAGERG<br/> GFNKPGGPMDEGPDLDLGPVDPDESDNSAIYVQGLNDSVTLDDLADFFKQCGVVKMNKRTGQPMIH<br/> IYLDKETGKPKGDATVSYEDPPTAKAAVEWFDGKDFQGSKLKVS LARKKPPMNSMRGGLPPREGRGM<br/> PPPLRGGPGGGPGGPMGRMGRRGGDRGGFPFRGPRGRSNGPSGGNVQHRAGDWQCPNPGC<br/> GNQNFARTECNQCKAPKPEGFLPPFPFPGDRGRGGPGGMRGGRRGGLMDRGGPGGMFRGGRG<br/> GDRGGFRGGRMDRGGFGGGRRGGPGPPGLMEQAIAGAPGSAGSAAGSGEQKLISEEDLLATMD<br/> <b>AQTRRRERRAEKQAQWKAANPPLDGAGAGAGAGAGAGGLATMDAQTRRRERRAEKQAQWKAANPP</b><br/> LDGAGAGAGAGAGAGGLATMDAQTRRRERRAEKQAQWKAANPPLDGAGAGAGAGAGAGGLATMDA<br/> <b>QTRRRERRAEKQAQWKAANPPLGLSYTDIEMNRLGKACPVPLQLPPLERLTLDDKKPLNLTISATGLWM</b><br/> SRTGTIHKIKHHEVSRSKIYIEMACGDHLVVNNSRSSRTARALRHHKYRKTCKRRCRVSEDLNKFLTKAN<br/> EDQTSVKVKVVSAPTRTKKAMPKSVARAPKLENTEAAQAQPSGSKFSPAIPVSTQESVSPASVSTSI<br/> SISTGATASALVKGNTNPITSMSAPVQASAPALTKSQTDRLEVLLNPKDEISLNSGKPFRELESELLSRRK<br/> KDLQQIYAEERENYLGKLEREITRFFVDRGFLEIKSPILIPLEYIERMGIDNDELTSKQIFRVDKNFCLRPML<br/> APNLANYLRKLDRALPDIKIFEIGPCYRKESDQKEHLEEFMNLNFCQMGSCTRENLESIITDFLNHLGID<br/> FKIVGDSCMVFGDTLDMVHGDLELSSAVVGPIPLDREWGIDKPWIGAGFGLERLLKVKHDFKNIKRAARS<br/> ESYNGISTNLASNDYTQATQSYGAYPTQPGQGYSSQSSQPYGQQSYSGYSQSTDTSGYGQSSYSS<br/> YGQSQNTGYGTQSTPQGYGSTGGYSSQSSQSSYGQSSYPGYGQQPAPSSTSGSYGSSSSQSSSY<br/> GQPQSGSYSQQPSYGGQQQSYGQQQSYNPPQGYGQQNQNSSSSGGGGGGGGGGNYGQDQSSMS<br/> SGGGSGGGYGNQDQSGGGGSGGYGQQDRGGRRGGSGGGGGGGGGYNRSSGGYEPRGRGGG<br/> RGGRRGGMGGSDRGGFNKFGGPRDQGSRRHDSEQDNSDNNTIFVQGLGENVTIESVADYFKQIGIHKTNK<br/> KTGQPMINLYTDRETGKLGKGEATVSFDDPPSAKAAIDWFDGKEFSGNPIKVSFATRRADFNRGGGNGR<br/> GGRGRGGPMGRGGYGGGGSGGGGRGGFPPSGGGGGGGQQRAGDWKCPNPTCENMNFWRNECN<br/> QCKAPKPDGPGGGPGGSHMGGNYGDDRRGGRRGGDKKPLNLTISATGLWMSRTGTIHKIKHHEVSRSKI<br/> YIEMACGDHLVVNNSRSSRTARALRHHKYRKTCKRRCRVSEDLNKFLTKANEDQTSVKVKVVSAPTRTK<br/> KAMPKSVARAPKLENTEAAQAQPSGSKFSPAIPVSTQESVSPASVSTSISSISTGATASALVKGNTNP<br/> ITSMSAPVQASAPALTKSQTDRLEVLLNPKDEISLNSGKPFRELESELLSRRKKDLQQIYAEERENYLGK<br/> EREITRFFVDRGFLEIKSPILIPLEYIERMGIDNDELTSKQIFRVDKNFCLRPMLAPNLANYLRKLDRALPDI<br/> KIFEIGPCYRKESDQKEHLEEFMNLNFCQMGSCTRENLESIITDFLNHLGIDFKIVGDSCMVFGDTLDM<br/> HGDLELSSAVVGPIPLDREWGIDKPWIGAGFGLERLLKVKHDFKNIKRAARSESYNGISTNL</p> |
| <p><b>OMM-<math>\lambda_{N22}</math><sup>-</sup></b><br/> <b>OT<sub>v2,AA</sub></b><br/> <i>TOM20<sub>1-70</sub></i><br/> <i>EWSR1<sub>1-628</sub></i><br/> <i>Myc</i></p>                                                                                                                                  | <p><b>MVGRNSAIAAGVCGALFIGYCIYFDRKRRSDPNFKNRLRERRKKQKLAKERAGLSKLPDLKDAEAVQKFF</b><br/> MASTDYSTYSQAAAQQGYSAYTAQPTQGYAQTQAYGQQSYGTYGQPTDVSYTQAQTTATYGGTAYA<br/> TSYGGPPTGYTTPTAPQAYSQPVQGYGTGAYDTTATVTTTQASYAAQSAYGTQPAYPAYGQQPAATA<br/> PTRPQDGNKPTETSQPQSSTGGYNQPSLGYGQSNYSYPQVPGSYPMQPVTAPPSYPTSYSSTQPTS<br/> YDQSSYSQQNTYQGPSSYGQSSYGQSSYGQQPPTSYPPTQGSYSQAPSQYSQQSSSYGQSSFR<br/> QDHPSSMGVYGQESGGFSGPGENRSMSPDNRGRGRGGFDRGGMSRGGRRGGGRRGGMGSAGERG</p>                                                                                                                                                                                                                                                                                                                                                                                                                                                                                                                                                                                                                                                                                                                                                                                                                                                                                                                                                                                                                                                                                                                                                                                                                                                                                                                                                                                                                                                                                                                                                                                                                                                                                                                                                                                                                                                                                                                                                                                                                                                                                                                                       |

$\lambda_{N22}$

*SPOT*

*NES*

*PyIRS<sup>AA</sup>*

*FUS<sub>1-478</sub>*

GFNKPGGPMDEGPDLDLGPPVDPDESDNSAIYVQGLNDSVTLDDLADFFKQCQGVVKMNKRTGQPMIH  
IYLDKETGKPKGDATVSYEDPPTAKAAVEWFDGKDFQGSKLKVS LARKKPPMNSMRGGLPPREGRGM  
PPPLRGGPGGGPGGPGGPMGRMGRRGGDRGGFPPRGRGSRGNPSGGGNVQHRAGDWQCPNPGC  
GNQNFARTECNQCKAPKPEGFLPPFPFPPGGDRGRGGPGGMRGGRGGLMDRGGPGGMFRGGRG  
GDRGGFRGGRGMDRGGFGGGRRGGPGGPPGLMEQAIAGAPGSAGSAAGSGEQKLISEEDLLATMD  
AQTRRRERRAEKQAQWKAANPPLDGAGAGAGAGAGAGGLATMDAQTRRRERRAEKQAQWKAANPP  
LDGAGAGAGAGAGAGGLATMDAQTRRRERRAEKQAQWKAANPPLDGAGAGAGAGAGAGGLATMDA  
QTRRRERRAEKQAQWKAANPPLGLSPDRVRAVSHWSSACPVPLQLPPLERLTLDDKKPLNTLISATGL  
WMSRTGTIHKIKHHEVSRSKIYIEMACGDHLVNNRSRSTARALRHHKYRKTCKRCRVSDLEDLNKFLTK  
ANEDQTSVKVKVVSAPTRTKKAMPKSVARAPKPLENTEAAQAQPSGSKFSPAIPVSTQESVSPASVST  
SISSISTGATASALVKGNTNPITSMSAPVQASAPALTKSQTDRLEVLLNPKDEISLNSGKPFRELESELLSR  
RKKDLQQIYAEERENYLGKLEREITRFFVDRGFLEIKSPILIPLEYIERMGIDNDELTSKQIFRVDKNFCLRP  
MLAPNLNYLRKLDRALPDPIKIFEIGPCYRKESDGKEHLEEFTMLAFAQMGSCTRENLESIITDFLNHL  
GIDFKIVGDSCMVYGD TLDVMHGDLELSSAVVGPIPLDREWIDKWPWIGAGFGLERLLKVKHDFKNIKRA  
ARSESYNGISTNLASNDYTQQATQSYGAYPTQPGQGYSSQSSQPYGQSSYSGYSQSTDTSGYGQSS  
YSSYGQSQNTGYGTQSTPQGYGSTGGYGSSQSSQSSYGGQSSYPGYGQQPAPSSTSGSYGSSSSQSS  
SYGQPQSGSYSQQPSYGGQQQSYGQQQSYNPPQGYGQQNQYNSSSGGGGGGGGGNYGQDQSS  
MSSGGGSGGGYGNQDQSGGGGSGGYGQQDRGGRGRGGSGGGGGGGGGYNRSSGGYEPGRGRG  
GGRGGRGGMGGS DRGGFNKFGGPRDQGSRHDSEQDNSDNNTIFVQGLGENVTIESVADYFKQIGIIKT  
NKKTGQPMINLYTDRETGKLGKGEATVSFDDPPSAKAAIDWFDGKEFSGNPIKVSFATRRADFNRRGGNG  
RGGRRGRGPMGRGGYGGGGSGGGGRRGGFPSSGGGGGGGQQRAGDWKCPNPTCENMNFWRNEC  
NQCKAPKPDGPGGGPGGSHMGGNYGDDRRGGRRGGDKKPLNTLISATGLWMSRTGTIHKIKHHEVSR  
KIYIEMACGDHLVNNRSRSTARALRHHKYRKTCKRCRVSDLEDLNKFLTKANEDQTSVKVKVVSAPTR  
TKKAMPKSVARAPKPLENTEAAQAQPSGSKFSPAIPVSTQESVSPASVSTSISSISTGATASALVKGNT  
NPITSMSAPVQASAPALTKSQTDRLEVLLNPKDEISLNSGKPFRELESELLSRKKDLQQIYAEERENYLG  
KLEREITRFFVDRGFLEIKSPILIPLEYIERMGIDNDELTSKQIFRVDKNFCLRPMLAPNLNYLRKLDRALP  
DPIKIFEIGPCYRKESDGKEHLEEFTMLAFAQMGSCTRENLESIITDFLNHLGIDFKIVGDSCMVYGD TLD  
VMHGDLELSSAVVGPIPLDREWIDKWPWIGAGFGLERLLKVKHDFKNIKRAARSESYNGISTNL
