# Supplementary material for: Dual film-like organelles enable spatial separation of orthogonal eukaryotic translation
Source: PubMed Central journal article supplement — Cell. 2021 Sep 16;184(19):4886–4903.e21. doi: 10.1016/j.cell.2021.08.001 (PMC8480389; doi:10.1016/j.cell.2021.08.001), 2021-09-16
Supplement: mmc4.pdf [file mmc4.pdf]

**Table S3. Related to STAR METHODS.** List of dual color reporters used to evaluate OT organelles in this study.

| Name                           | Plasmid                                                                                            | Associated Figures | Description                                                                                                                                                                                                                                                                                                                                                                                                                                    |
|--------------------------------|----------------------------------------------------------------------------------------------------|--------------------|------------------------------------------------------------------------------------------------------------------------------------------------------------------------------------------------------------------------------------------------------------------------------------------------------------------------------------------------------------------------------------------------------------------------------------------------|
| dual color ms2 reporter        | pBI_NLS::mCherry <sup>190TAG</sup> ::6xHis::2xms2_NLS::FLAG::EGFP <sup>39TAG</sup> ::6xHis         | 2, 3, S1, S6       | The ms2 reporter is used to evaluate the selectivity and efficiency of MCP-based OT organelle in comparison to cytoplasmic translation. It was used for FFC analysis.                                                                                                                                                                                                                                                                          |
| dual color boxB reporter       | pBI_NLS::mCherry <sup>190TAG</sup> ::6xHis::4xboxB_NLS::FLAG::EGFP <sup>39TAG</sup> ::6xHis        | 2, 3, S1, S6       | The boxB reporter is used to evaluate the selectivity and efficiency of $\lambda_{N22}$ -based OT organelle in comparison to cytoplasmic translation. It was used for FFC analysis.                                                                                                                                                                                                                                                            |
| double-recruitment reporter    | pBI_NLS::mCherry <sup>190TAG</sup> ::6xHis::2xms2_NLS::FLAG::EGFP <sup>39TAG</sup> ::6xHis::4xboxB | 5, S3, S7          | The double-recruitment reporter is used to evaluate if an OT organelle system selectively translates ms2- or boxB-tagged mRNAs. This is for example used to compare the combined OT organelles and asses which organelle is more active in presence of a specific ncAA. It was used for FFC analysis and imaging                                                                                                                               |
| doubly tagged imaging reporter | pBI_H2B::mCherry <sup>190TAG</sup> ::6xHis::2xms2_Nup153::EGFP <sup>149TAG</sup> ::6xHis::4xboxB   | 2, 5, 6            | The doubly tagged imaging reporter is used to evaluate if an OT organelle system selectively translates ms2- or boxB-tagged mRNAs. It is analogous to the double-recruitment reporter however it was exclusively used for fluorescence microscopy. If an organelle translates ms2-tagged mRNAs red fluorescence is observed in the nucleus, if an organelle translates boxB-tagged mRNA green fluorescence can be detected at the nuclear rim. |
