# Supplementary material for: Dual film-like organelles enable spatial separation of orthogonal eukaryotic translation
Source: PubMed Central journal article supplement — Cell. 2021 Sep 16;184(19):4886–4903.e21. doi: 10.1016/j.cell.2021.08.001 (PMC8480389; doi:10.1016/j.cell.2021.08.001), 2021-09-16
Supplement: mmc5.pdf [file mmc5.pdf]

**Table S4. Related to STAR METHODS.** List of protein sequences used for LC-MS/MS analysis (differing amino acid shown in red).

| Name                    | Sequence                                                                                                                                                                                                                                                                                             |
|-------------------------|------------------------------------------------------------------------------------------------------------------------------------------------------------------------------------------------------------------------------------------------------------------------------------------------------|
| mCherry <sup>190K</sup> | MGRLESTPPKKKRRKVEDSASVSKGEEDNMAIIKEFMRFKVHMEGSVNGHEFEIEGEGE<br>GRPYEGTQTAKLKVTKGGPLPFAWDILSPQFMYGSKAYVKHPADIPDYKLSFPEGFKW<br>ERVMNFEDGGVVTVTQDSSLQDGEFIYKVKLRGTNFPDGPVMQKKTMGWEASSERM<br>YPEDGALKGEIKQRLKLDGGHYDAEVKTTYKAKKPVQLPGAYNVNIKLDITSHNEDYTI<br>VEQYERAEGRHSTGGMDELYKHHHHHH                  |
| mCherry <sup>190F</sup> | MGRLESTPPKKKRRKVEDSASVSKGEEDNMAIIKEFMRFKVHMEGSVNGHEFEIEGEGE<br>GRPYEGTQTAKLKVTKGGPLPFAWDILSPQFMYGSKAYVKHPADIPDYKLSFPEGFKW<br>ERVMNFEDGGVVTVTQDSSLQDGEFIYKVKLRGTNFPDGPVMQKKTMGWEASSERM<br>YPEDGALKGEIKQRLKLDGGHYDAEVKTTYKAKFPVQLPGAYNVNIKLDITSHNEDYTIV<br>EQYERAEGRHSTGGMDELYKHHHHHH                  |
| EGFP <sup>39K</sup>     | MGRLESTPPKKKRRKVEDSASDYKDDDDKVSKGEELFTGVVPILVELDGDVNGHKFSVS<br>GEGEGDATK GKLT LKFICTTGKLPVPWPTLVTTLT YGVQCFSRYPDHMKQHDFFKSAM<br>PEGYVQERTIFFKDDGNYKTRAEVKFEGDTLVNRIELKGIDFKEDGNILGHKLEYNYN SH<br>NVYIMADKQKNGIKANFKIRHNIEDGSVQLADHYQQNTPIGDGPVLLPDNHYLSTQSALS<br>KDPNEKRDHMLLEFVTAAGITLGMDELYKHHHHHH |
| EGFP <sup>39F</sup>     | MGRLESTPPKKKRRKVEDSASDYKDDDDKVSKGEELFTGVVPILVELDGDVNGHKFSVS<br>GEGEGDATF GKLT LKFICTTGKLPVPWPTLVTTLT YGVQCFSRYPDHMKQHDFFKSAMP<br>EGYVQERTIFFKDDGNYKTRAEVKFEGDTLVNRIELKGIDFKEDGNILGHKLEYNYN SHN<br>VYIMADKQKNGIKANFKIRHNIEDGSVQLADHYQQNTPIGDGPVLLPDNHYLSTQSALS<br>KDPNEKRDHMLLEFVTAAGITLGMDELYKHHHHHH |
